# Supplementary material for: Ameliorative Effect of Graviola (Annona muricata) on Mono Sodium Glutamate-Induced Hepatic Injury in Rats: Antioxidant, Apoptotic, Anti-inflammatory, Lipogenesis Markers, and Histopathological Studies
Source: PubMed Central journal article supplement (PMC7693810; doi:10.3390/ani10111996), 2020-10-30
Supplement: animals-10-01996-s001.pdf [file animals-10-01996-s001.pdf]

Article

# Ameliorative Effect of Graviola (*Annona muricata*) on Mono Sodium Glutamate-Induced Hepatic Injury in Rats: Antioxidant, Apoptotic, Anti-inflammatory, Lipogenesis Markers, and Histopathological Studies

Mustafa Shukry <sup>1,\*</sup> Ahmed M. El-Shehawi <sup>2,3</sup>, Wafaa M. El-Kholy <sup>4</sup>, Rasha A. Elsisy <sup>5</sup>, Hazem S. Hamoda <sup>6</sup>, Hossam G. Tohamy <sup>7</sup>, Mohamed M. Abumandour <sup>8</sup> and Foad A. Farrag <sup>9</sup>

<sup>1</sup> Department of Physiology, Faculty of Veterinary Medicine, Kafrelsheikh University, 33511 Kafrelsheikh, Egypt

<sup>2</sup> Department of Biotechnology, College of Science, Taif University, P.O. Box 11099, Taif 21944, Saudi Arabia; elshehawi@hotmail.com

<sup>3</sup> Department of Genetics, Faculty of Agriculture, Alexandria University, 21527 Alexandria, Egypt

<sup>4</sup> Department of Zoology, Faculty of Science, Mansoura University, 35516 Mansoura, Egypt; wafaa\_elkholy2002@yahoo.com

<sup>5</sup> Department of Anatomy, Faculty of Medicine, Kafrelsheikh University, 33516 Kafrelsheikh, Egypt; Rasha\_2002@yahoo.com

<sup>6</sup> Department of Anatomy and Embryology, Faculty of Veterinary Medicine, Aswan University, 81528 Aswan, Egypt; Hamouda2000@yahoo.com

<sup>7</sup> Department of pathology., Faculty of Veterinary Medicine, Alexandria University, 22785 Alexandria, Egypt; hossam.gafar@yahoo.com

<sup>8</sup> Department of Anatomy and Embryology., Faculty of Veterinary Medicine, Alexandria University, 22785 Alexandria, Egypt; m.abumandour@yahoo.com

<sup>9</sup> Department of Anatomy and Embryology, Faculty of Veterinary Medicine, Kafrelsheikh University, 33511 Kafrelsheikh, Egypt; foad.farrag@yahoo.com

\* Correspondence: mostafa.ataa@vet.kfs.edu.eg

Received: 29 September 2020; Accepted: 23 October 2020; Published: date

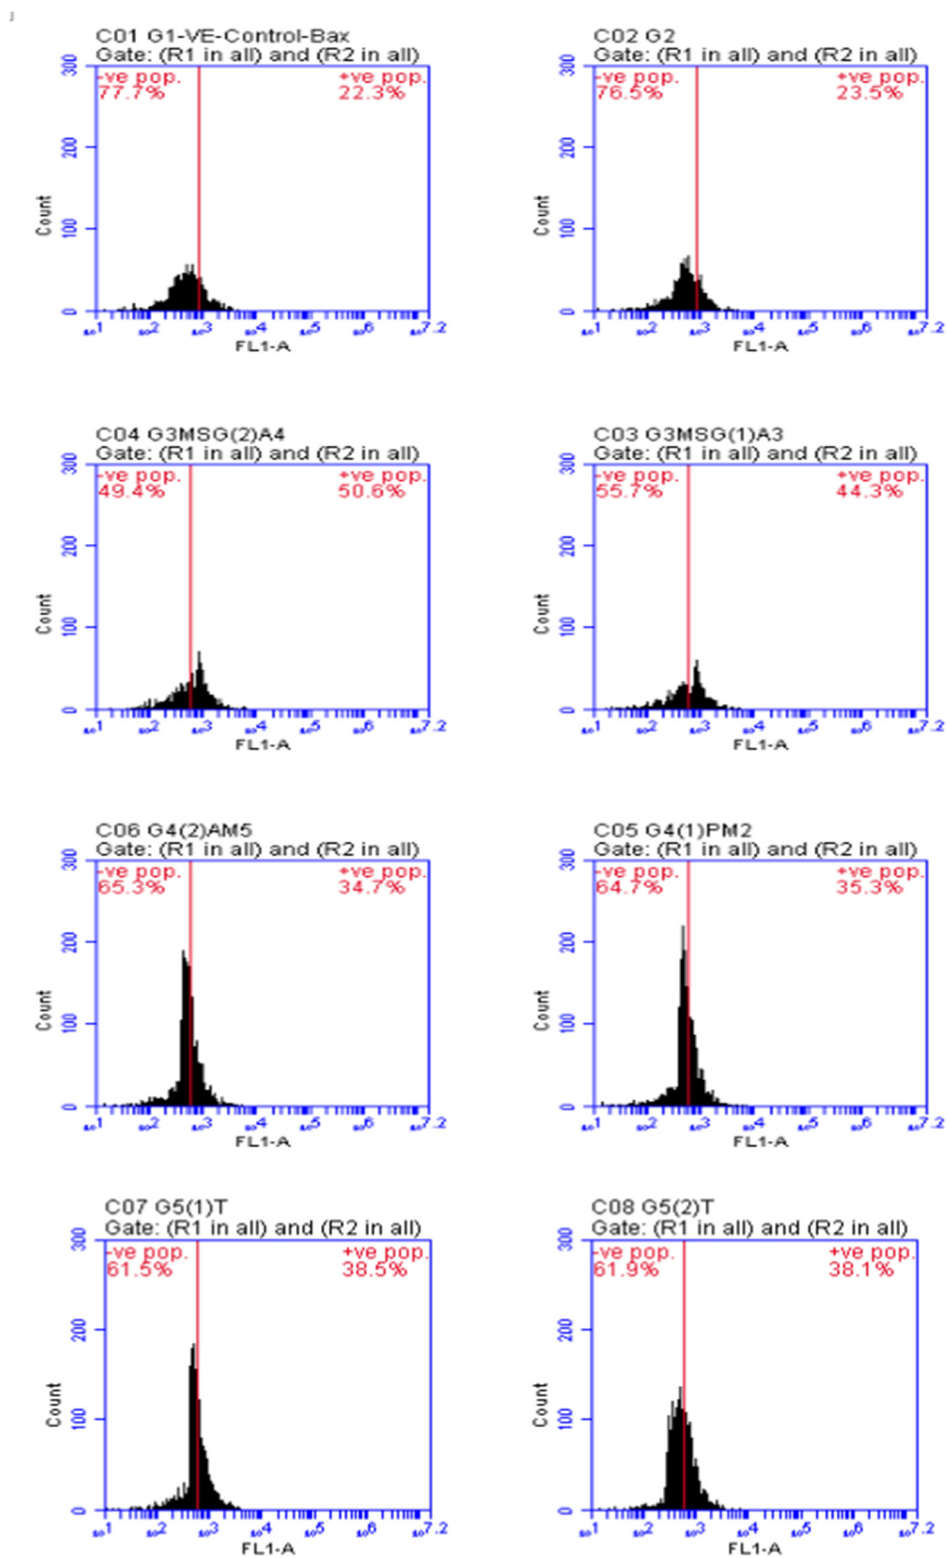

Figure S1: Bax flowcytometry.

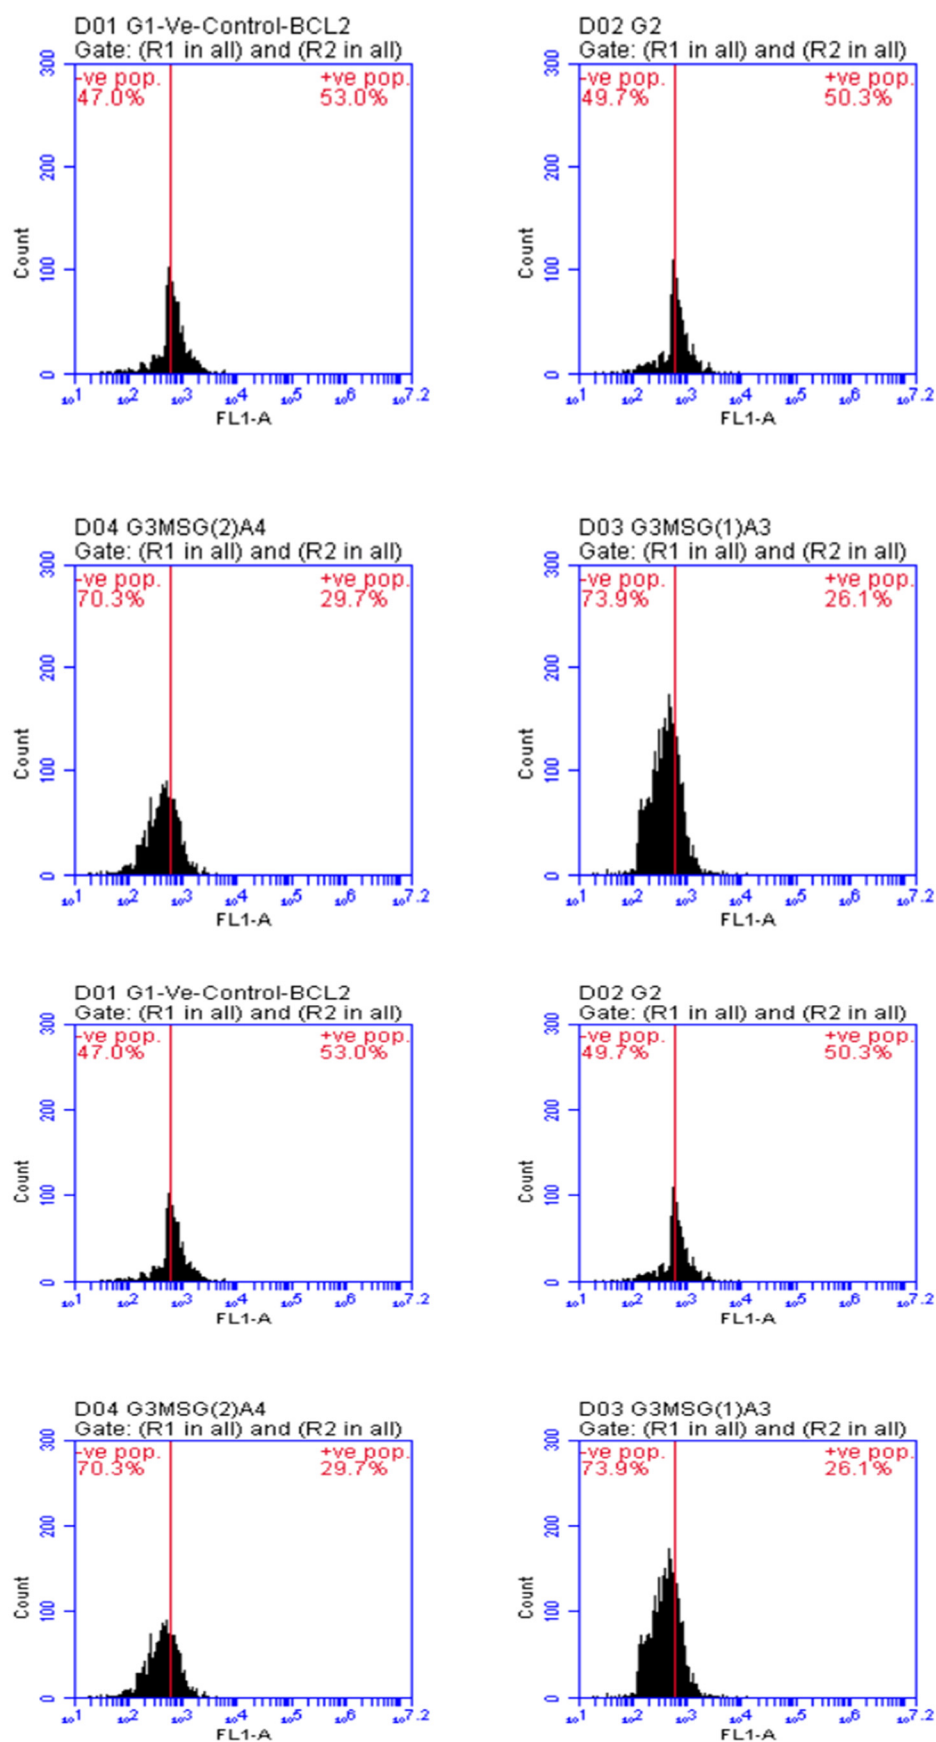

Figure S2: Bcl2 flowcytometry.

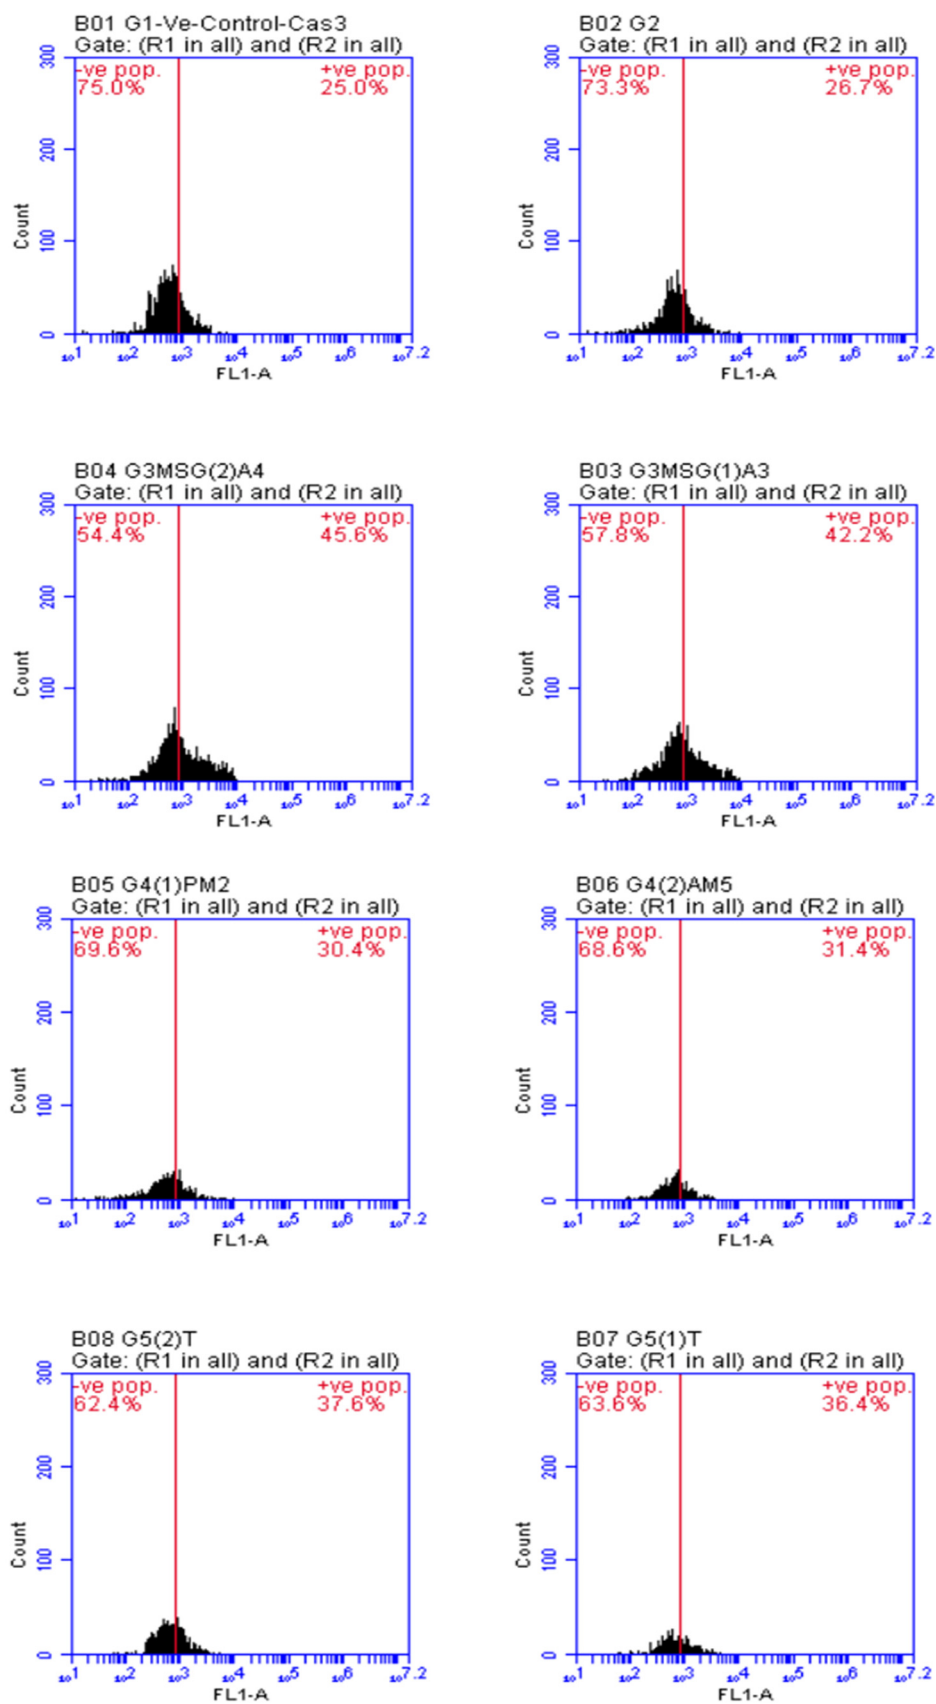

Figure S3: Caspase 3 flowcytometry.

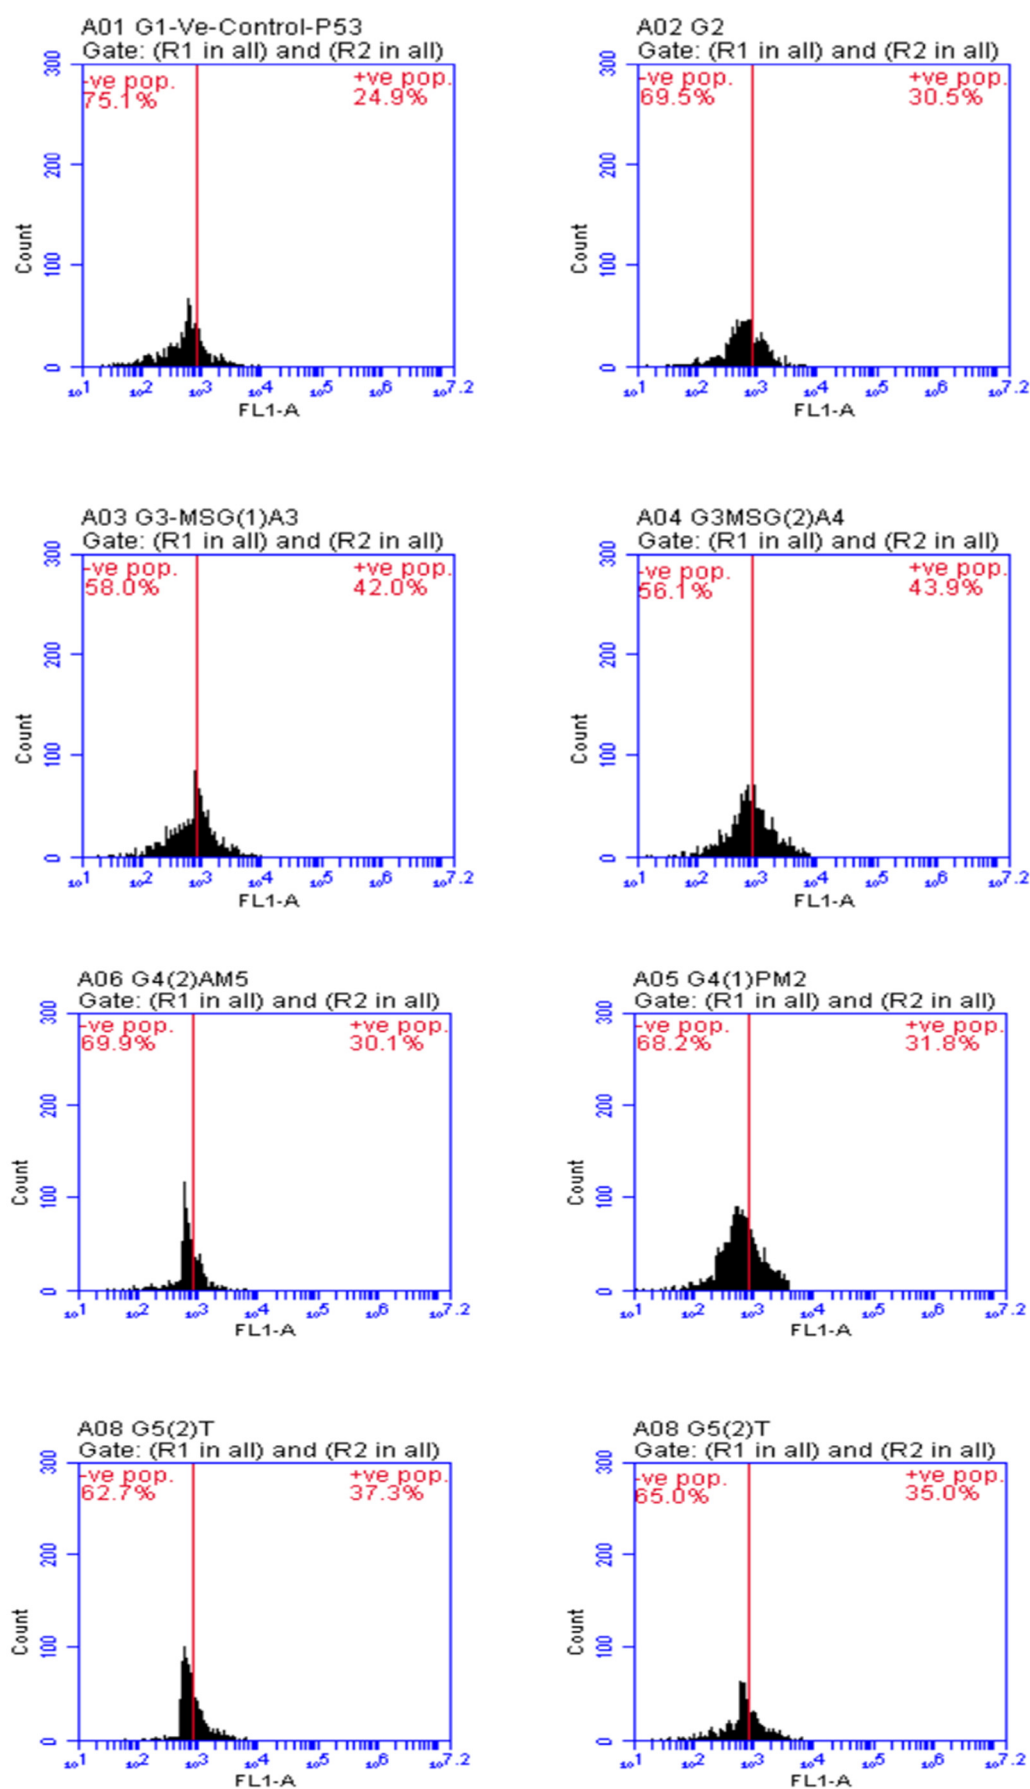

Figure S4: P53 flowcytometry.
